# Supplementary material
Source: HighWire-hosted journal article supplement (http://jpet.aspetjournals.org/highwire/filestream/136323/field_highwire_adjunct_files/0/jpet_203448_suppl_table.pdf)
Supplement: jpet_203448_suppl_table.pdf [file jpet_203448_suppl_table.pdf]

**Supplemental Table. “Composition of the control and experimental diets (g/100g)”**

by Yoshizumi Kishino, Yuji Tanaka, Takanori Ikeda, Kazuo Yamamoto, Hiroshi Ogawa, Yoshinori Iwatani and Toshinori Kamisako. *Journal of Pharmacology and Experimental Therapeutics*. Abbreviations: C, the control group; CE, the control plus ezetimibe group; H, the high-fat diet group; HE, the high-fat diet plus ezetimibe group; CI, the control plus iron group; CIE, the control plus iron plus ezetimibe group; HI, the high-fat diet plus iron group; HIE, the high-fat diet plus iron plus ezetimibe group.

## Experiment 1

|                          | C     | CE        | H     | HE        |
|--------------------------|-------|-----------|-------|-----------|
| Lard                     | —     | —         | 20.00 | 20.00     |
| Ezetimibe                | —     | 0.007     | —     | 0.013     |
| Daily ezetimibe intake   | —     | 0.3mg/day | —     | 0.3mg/day |
| Soybean oil              | 4.00  | 4.00      | 4.00  | 4.00      |
| Milk casein              | 14.00 | 14.00     | 14.00 | 14.00     |
| L-Cystine                | 0.18  | 0.18      | 0.18  | 0.18      |
| AIN-93G mineral mixture  | 3.50  | 3.50      | 3.50  | 3.50      |
| AIN-93VX vitamin mixture | 1.00  | 1.00      | 1.00  | 1.00      |
| Cellulose powder         | 5.00  | 5.00      | 5.00  | 5.00      |
| Corn starch              | 46.57 | 46.57     | 26.57 | 26.57     |
| $\alpha$ -Corn starch    | 15.50 | 15.50     | 15.50 | 15.50     |
| Sucrose                  | 10.00 | 10.00     | 10.00 | 10.00     |
| Choline bitartrate       | 0.25  | 0.25      | 0.25  | 0.25      |

|                      | C     | CE    | H     | HE    |
|----------------------|-------|-------|-------|-------|
| Energy (kJ/g diet)   | 15.95 | 15.95 | 20.13 | 20.13 |
| Energy (kcal/g diet) | 3.81  | 3.81  | 4.81  | 4.81  |

## Experiment 2

|                            | CI         | CIE        | HI         | HIE        |
|----------------------------|------------|------------|------------|------------|
| Lard                       | —          | —          | 20.00      | 20.00      |
| Ezetimibe                  | —          | 0.007      | —          | 0.015      |
| Daily ezetimibe intake     | —          | 0.3mg/day  | —          | 0.3mg/day  |
| Carbonyl iron              | 0.54       | 0.54       | 1.00       | 1.00       |
| Daily carbonyl iron intake | 21.3mg/day | 21.1mg/day | 24.3mg/day | 22.7mg/day |
| Soybean oil                | 4.00       | 4.00       | 4.00       | 4.00       |
| Milk casein                | 14.00      | 14.00      | 14.00      | 14.00      |
| L-Cystine                  | 0.18       | 0.18       | 0.18       | 0.18       |
| AIN-93G mineral mixture    | 3.50       | 3.50       | 3.50       | 3.50       |
| AIN-93VX vitamin mixture   | 1.00       | 1.00       | 1.00       | 1.00       |
| Cellulose powder           | 5.00       | 5.00       | 5.00       | 5.00       |
| Corn starch                | 46.04      | 46.04      | 25.57      | 25.57      |
| $\alpha$ -Corn starch      | 15.50      | 15.50      | 15.50      | 15.50      |

|                      |       |       |       |       |
|----------------------|-------|-------|-------|-------|
| Sucrose              | 10.00 | 10.00 | 10.00 | 10.00 |
| Choline bitartrate   | 0.25  | 0.25  | 0.25  | 0.25  |
|                      | CI    | CIE   | HI    | HIE   |
| Energy (kJ/g diet)   | 15.87 | 15.87 | 19.97 | 19.97 |
| Energy (kcal/g diet) | 3.79  | 3.79  | 4.77  | 4.77  |
